# Supplementary material
Source: HighWire-hosted journal article supplement (http://dmd.aspetjournals.org/highwire/filestream/73035/field_highwire_adjunct_files/0/85787SupplData.pdf)

## SUPPLEMENTAL INFORMATION

# The Time-course of Aldehyde Oxidase and Why it is Nonlinear

Armina Abbasi, Erickson M. Paragas, Carolyn A. Joswig-Jones,

John T. Rodgers, and Jeffrey P. Jones

Department of Chemistry, Washington State University, Pullman, WA 99164-4630

**Drug Metabolism and Disposition**

**Supplemental Table 1.** Comparison between the rate constants obtained from the fits to the substrate inhibition models and the MAM.

| <b>substrate</b> | <b>rate constants</b> | <b>SI 1</b> | <b>SI 2</b> | <b>SI 3</b> | <b>MAM</b> |
|------------------|-----------------------|-------------|-------------|-------------|------------|
| DACA             | k3 (1/min)            | 23.35       | 28.63       | 80.24       | 22.96      |
|                  | k4 (1/min)            | 0.04        | 0.05        | ---         | 0.019      |
|                  | k5 (1/min)            | 2.12        | 2.15        | ---         | 3.46       |
| phthalazine      | k3 (1/min)            | 167.2       | 200.99      | 265.71      | 168.63     |
|                  | k4 (1/min)            | 0.97        | 1.16        | ---         | 0.49       |
|                  | k5 (1/min)            | 3.15        | 3.15        | ---         | 5.25       |

**Supplemental Fig. 1.** The time-course data for different substrates of aldehyde oxidase, A) DACA, B) zaleplon, C) phthalazine, D) BIBX1382, E) zoniporide, were fit to three different kinetic models namely, modulated activity model (MAM), dead model, and Michaelis-Menten. The goodness of fit was judged to be the best to the MAM (with the exception of zoniporide) by the Akaike value (AIC).

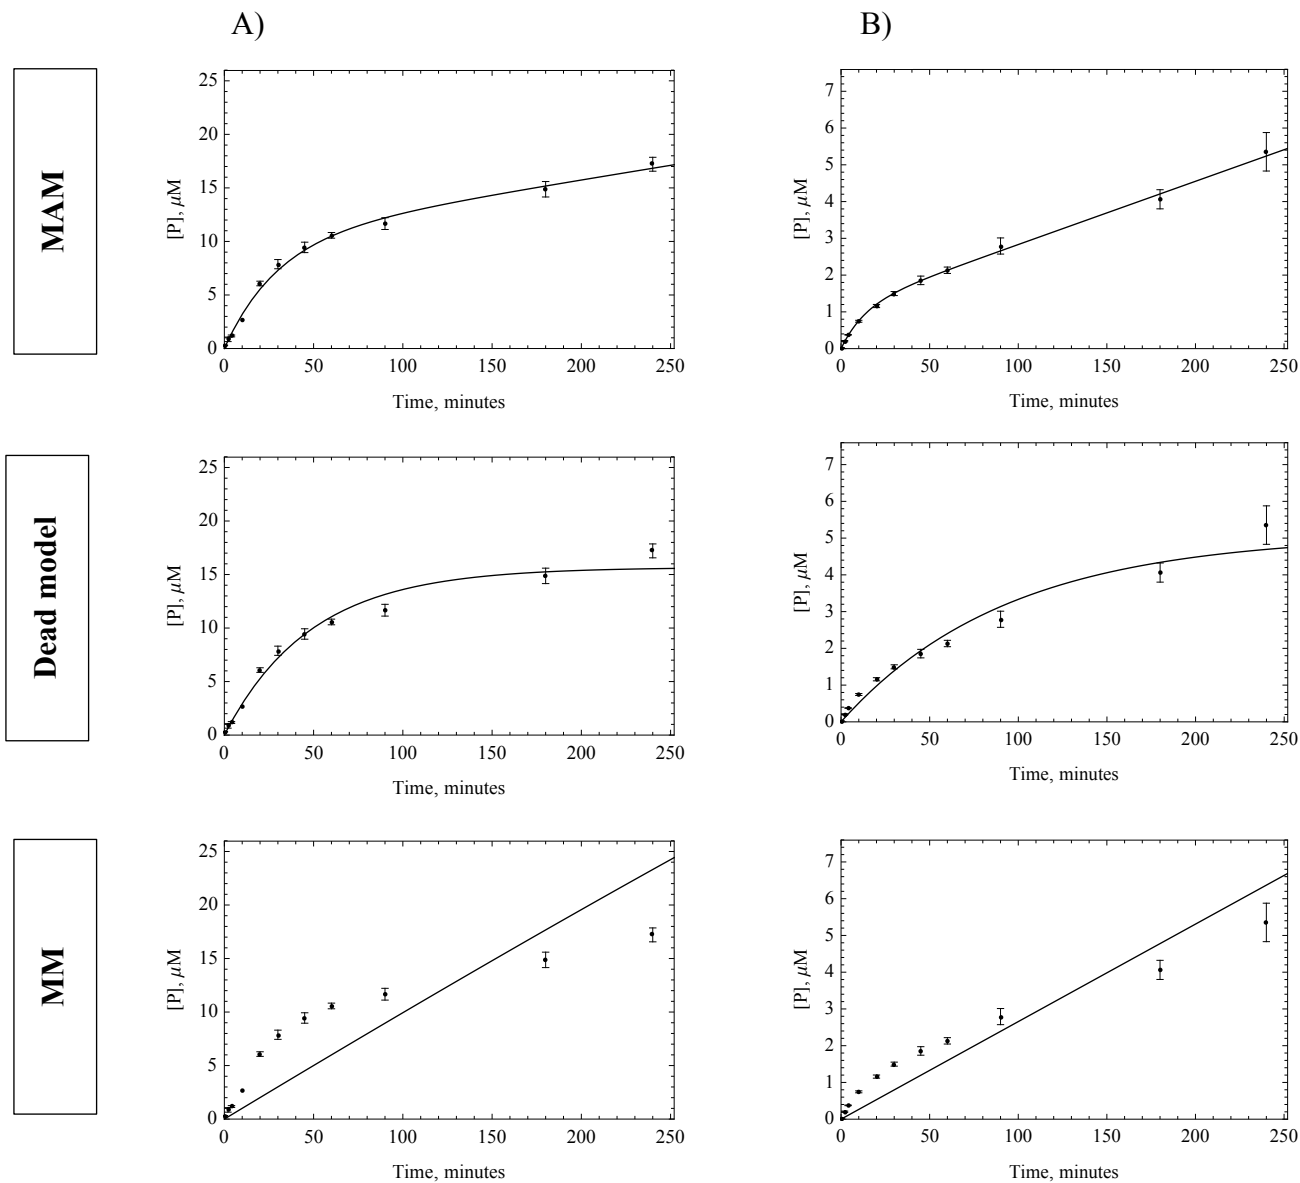

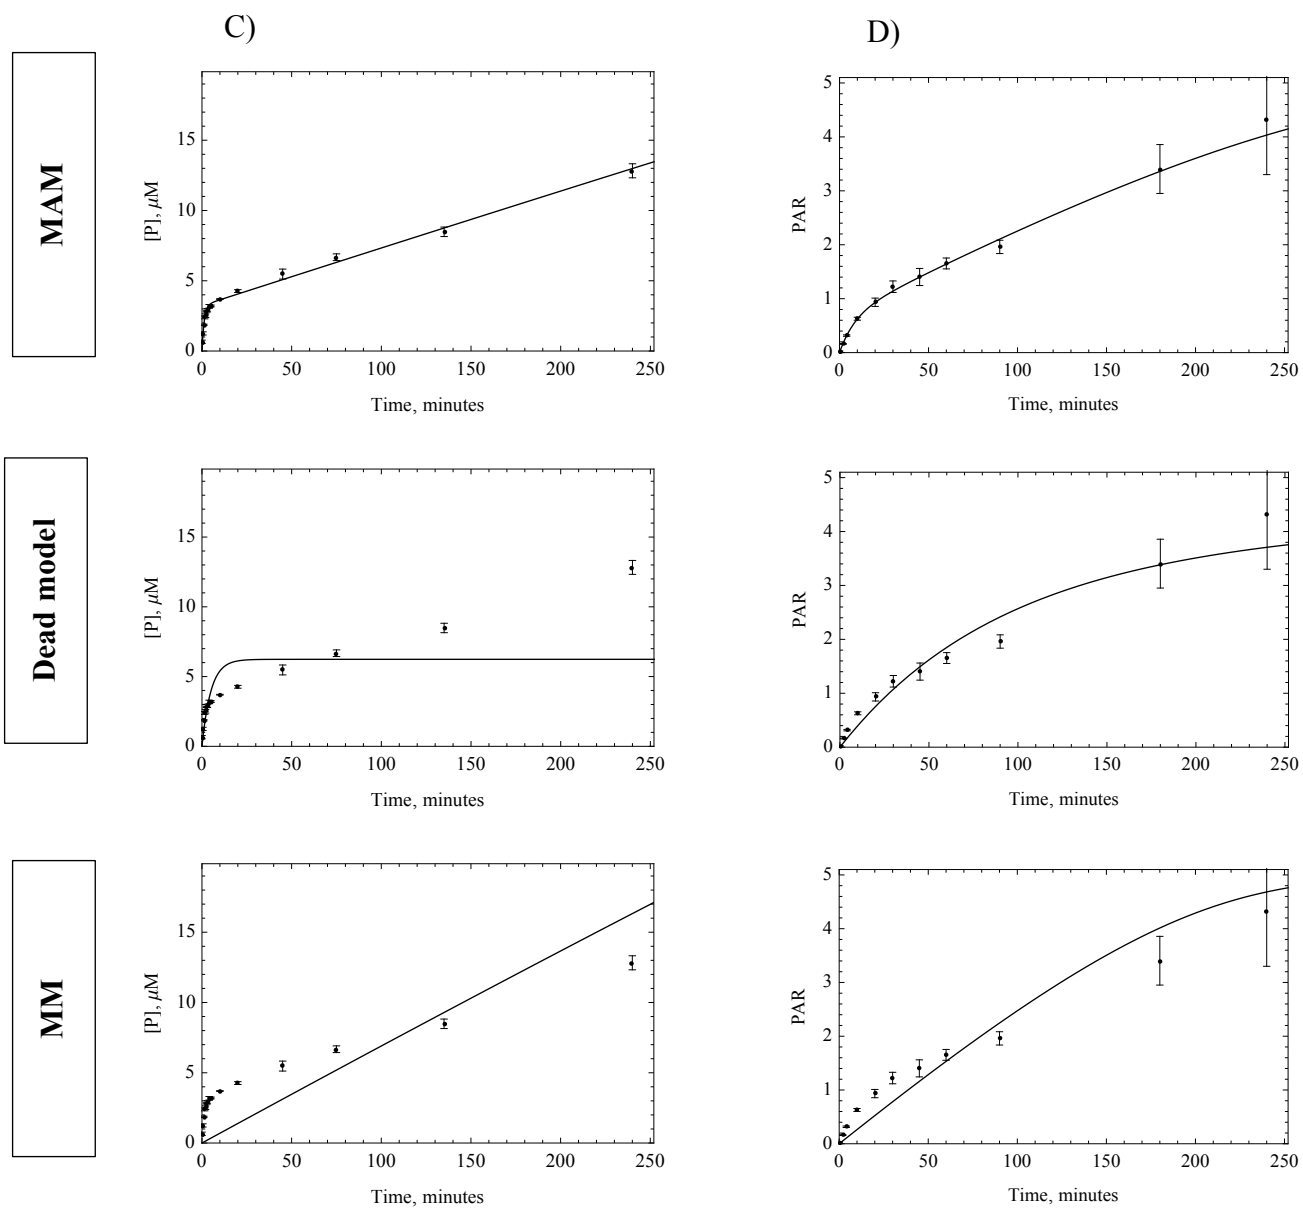

E)

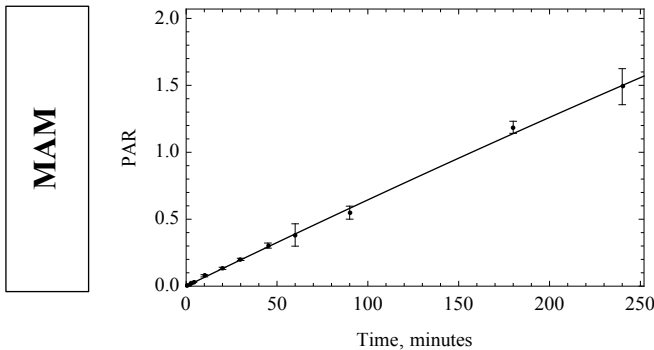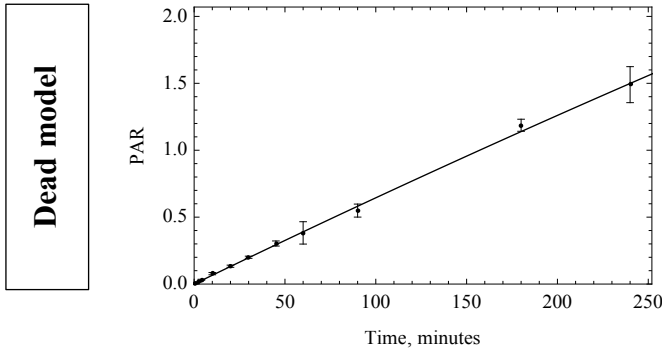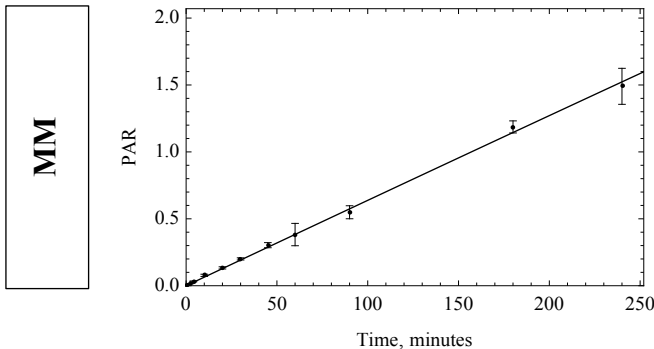

**Supplemental Fig. 2.** Kinetic scheme of substrate inhibition. The subscripts m and f refer to the Moco site and the flavin site respectively since we are assuming that the second substrate goes to the flavin site. We have set  $k_7 = k_1$  with the exception of model 3 in which  $k_6$  was set to a value closer to the initial guess for  $k_3$  to get a better fit. In all the models  $k_6$  was set equal to  $K_i \times k_7$ .

A) Substrate inhibition model 1 (SI 1)

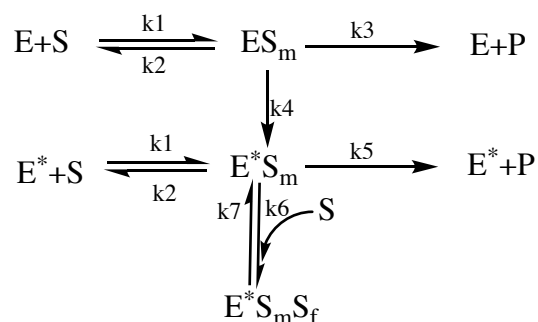

B) Substrate inhibition model 2 (SI 2)

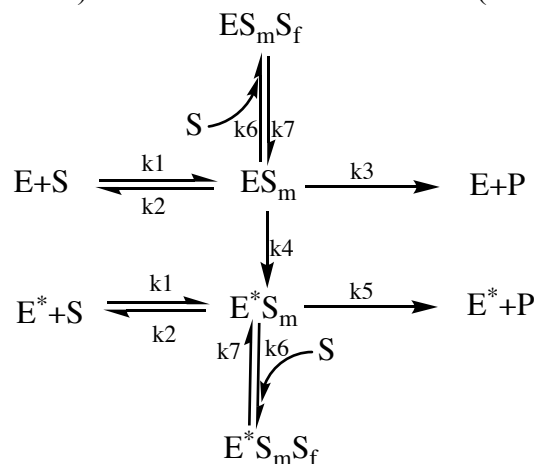

C) Substrate inhibition model3 (SI 3)

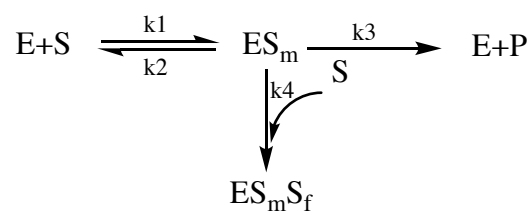

**Supplemental Fig. 3.** Comparing the fits from the MAM and the substrate inhibition models to the two substrates A) DACA and B) phthalazine that exhibit substrate inhibition. Based on the AIC values, the substrate inhibition model does not necessarily provide a better fit.

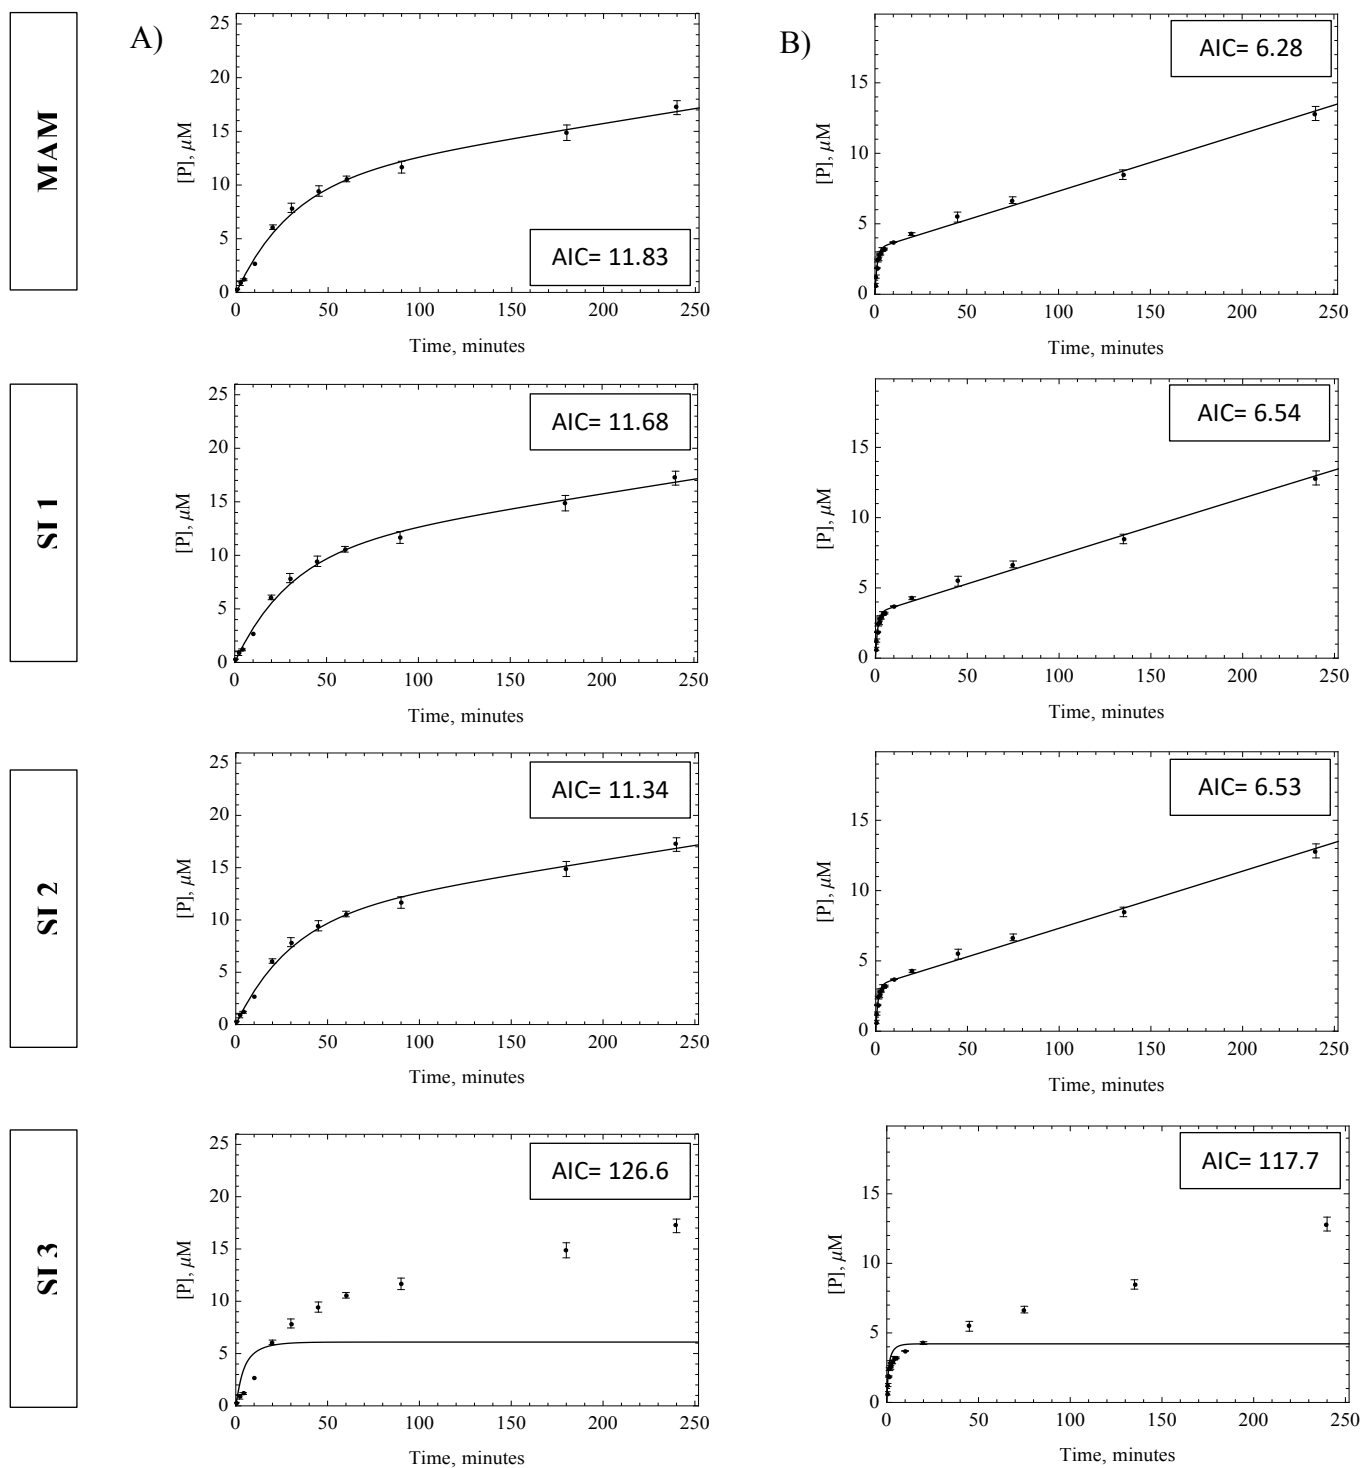

**Supplemental Fig. 4.** The time course plot of O6BG in human liver S9 fraction shows that the nonlinear behavior of the enzyme persists even in a more intact cell machinery. The data points were fit to the three kinetic models, MAM, Dead model, and MM, (n=3, P< 0.001).

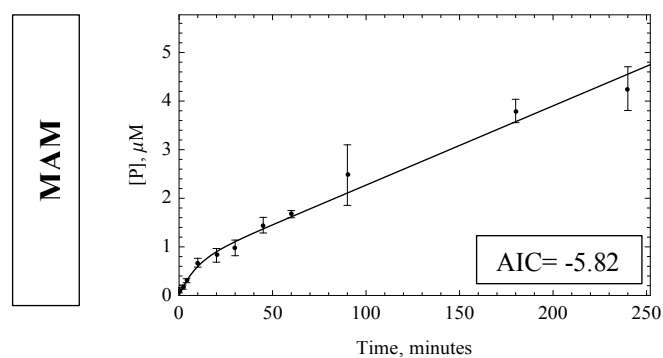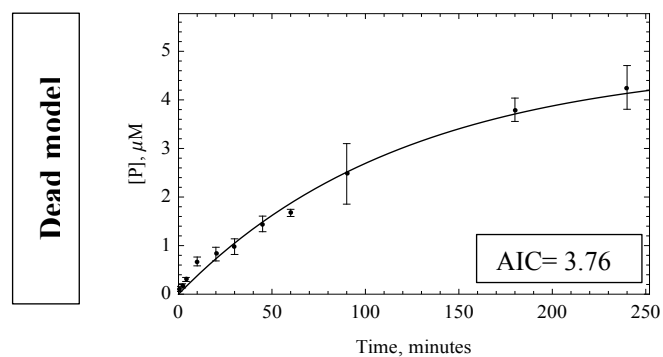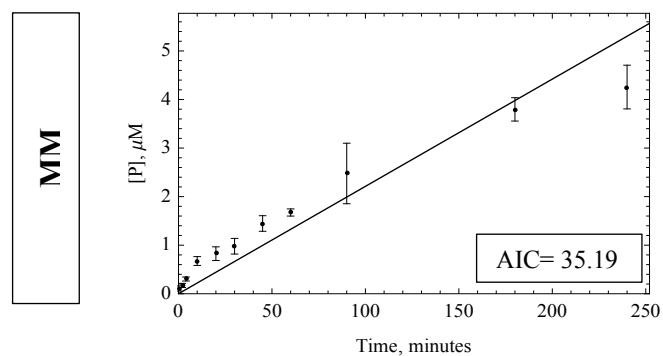



**Supplemental Fig. 5.** In vivo intrinsic clearance vs. in vitro intrinsic clearance calculated based on the MAM model shows a linear correlation for the three substrate (O6BG, DACA, zaleplon) used for the in vitro calculations. This linearity may refer to the probability of involvement of extrahepatic clearance by AOX.

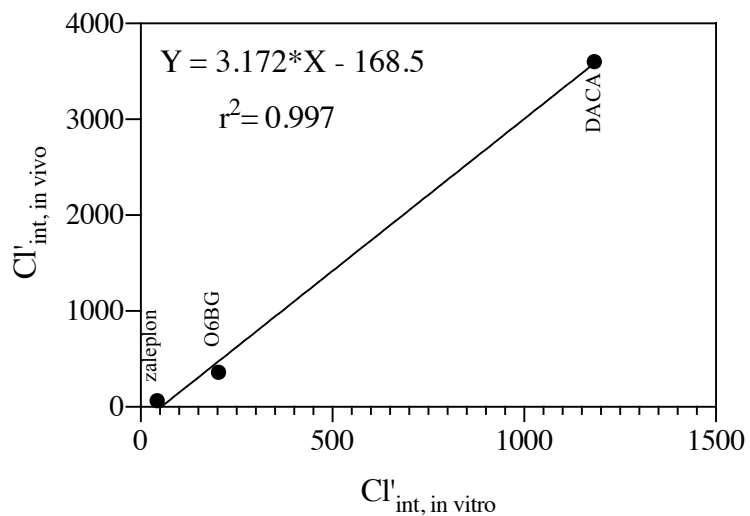

Supplement: 85787SupplData.pdf [file 85787SupplData.pdf]
